# Supplementary material for: Fishing spider in India: first record of family Dolomedidae with the description of a new species
Source: Research Square preprint supplement (doi:10.21203/rs.3.rs-7043304/v1), 2025-07-23
Supplement: Supplementary file 1 [file 4aae89560d47c5aaf3afce12.xlsx]

## Sheet: Sheet1
	Supplementary Data Table 2
	S.No	Voucher ID	Description	Sex	Collectors	Location	Coordinates
	1	KFRI-IC-VII-B-24-1424	Holotype, collected from a shallow stream near Wayanad Wild resort, by hand.	M	Jithu, Arjun & Umesh	Wayanad, Lakkidi	11.515027N 76.036765E
	2	KFRI-IC-VII-B-24-1426	Paratype, collected from a shallow stream near Wayanad Wild resort, by hand.	M	Jithu, Arjun & Umesh	Wayanad, Lakkidi	11.5144 N 76.03682 E
	3	KFRI-IC-VII-B-24-1427	Paratype, collected from a shallow stream near Wayanad Wild resort, by hand.	M	Jithu, Arjun & Umesh	Wayanad, Lakkidi	11.5143 N 76.03677 E
	4	KFRI-IC-VII-B-24-1425	Paratype, collected from a shallow stream near Wayanad Wild resort, by hand.	F	Jithu, Arjun & Umesh	Wayanad, Lakkidi	11.51418 N 76.03682 E
	5	KFRI-IC-VII-B-24-1428	Paratype, collected from a shallow stream near Wayanad Wild resort, by hand.	F	Jithu, Arjun & Umesh	Wayanad, Lakkidi	11.51393 N 76.0369 E
	6	KFRI-IC-VII-B-24-1429	Paratype, collected from a shallow stream near Wayanad Wild resort, by hand.	F	Jithu, Arjun & Umesh	Wayanad, Lakkidi	11.51406 N 76.03675 E
	7	KFRI-IC-VII-B-24-1430	Paratype, collected from a shallow stream near Wayanad Wild resort, by hand.	J	Jithu, Arjun & Umesh	Wayanad, Lakkidi	11.51388 N 76.03670 E
	8	KFRI-IC-VII-B-24-1431	Paratype, collected from a shallow stream near Wayanad Wild resort, by hand.	J	Jithu, Arjun & Umesh	Wayanad, Lakkidi	11.51359 N 76.03645 E
