# Supplementary material for: Fishing spider in India: first record of family Dolomedidae with the description of a new species
Source: Research Square preprint supplement (doi:10.21203/rs.3.rs-7043304/v1), 2025-07-23
Supplement: Supplementary file 2 [file 4af03cad2a62c24dc068b360.xlsx]

## Sheet: Sheet1
Sl.No	Species name	Accession number	Geoographical area
1	Dolomedes yawatai	AB374067.1	PALEARCTIC
3	Dolomedes raptor	AB374045.1
4	Dolomedes raptor	AB374044.1
5	Dolomedes japonicus	AB374043.1
6	Dolomedes orion	AB374050.1
7	Dolomedes orion	AB374049.1
8	Dolomedes orion	AB374046.1
9	Dolomedes zatsun	AB687498.1
10	Dolomedes silvicola	AB374061.1
11	Dolomedes silvicola	AB374060.1
12	Dolomedes saganus	AB374059.1
13	Dolomedes saganus	AB374058.1
14	Dolomedes sulfureus	AB374057.1
15	Dolomedes sulfureus	AB374056.1
16	Dolomedes sulfureus	MF467667.1
17	Dolomedes sulfureus	MF467665.1
18	Dolomedes sulfureus	MF467666.1
19	Dolomedes angustivirgatus	AB374055.1
20	Dolomedes angustivirgatus	AB374054.1
21	Dolomedes angustivirgatus	AB374052.1
22	Dolomedes angustivirgatus	AB374053.1
23	Dolomedes fontus	AB374051.1
24	Dolomedes pegasus	AB687497.1
25	Dolomedes pegasus	AB687496.1
26	Dolomedes fimbriatus	MZ611150.1
27	Dolomedes fimbriatus	MZ610075.1
28	Dolomedes fimbriatus	MZ629031.1
29	Dolomedes plantarius	KX537002.1
30	Dolomedes plantarius	KX536937.1
31	Dolomedes senilis	AB687495.1
32	Dolomedes senilis	AB687493.1
33	Dolomedes senilis	AB687494.1
34	Dolomedes striatus	MG048762.1	NEARCTIC
35	Dolomedes striatus	MG046985.1
36	Dolomedes striatus	MG046707.1
37	Dolomedes tenebrosus	MF816967.1
38	Dolomedes tenebrosus	MF810118.1
39	Dolomedes tenebrosus	MF810836.1
40	Dolomedes scriptus	MF816891.1
41	Dolomedes scriptus	GU682879.1
42	Dolomedes scriptus	GU682876.1
43	Dolomedes triton	JF887047.1
44	Dolomedes triton	MF815050.1
45	Dolomedes triton	MF815632.1
46	Dolomedes rotundus	OR284754.1	AFROTROPIC (MADAGASCAR)
47	Dolomedes rotundus	OR284753.1
48	Dolomedes rotundus	OR284752.1
49	Dolomedes hydatostella	OR284746.1
50	Dolomedes hydatostella	OR284747.1
51	Dolomedes hydatostella	OR284748.1
52	Dolomedes kalanaro	OR284712.1
53	Dolomedes kalanaro	OR284697.1
54	Dolomedes kalanaro	OR284709.1
55	Dolomedes kalanaro	OR284705.1
56	Dolomedes greogoric	OR284741.1
57	Dolomedes greogoric	OR284743.1
58	Dolomedes greogoric	OR284742.1
59	Dolomedes bedjanic	OR284703.1
60	Dolomedes bedjanic	OR284726.1
61	Dolomedes bedjanic	OR284725.1
62	Dolomedes aquaticus	GQ337371.1	NEW ZEALAND
63	Dolomedes aquaticus	GQ337369.1
64	Dolomedes aquaticus	GQ337370.1
65	Dolomedes minor	GQ337354.1
66	Dolomedes minor	GQ337353.1
67	Dolomedes minor	GQ337352.1
68	Dolomedes dondalei	GQ337381.1
69	Dolomedes dondalei	GQ337380.1
70	Dolomedes dondalei	GQ337379.1
71	Dolomedes schauinslandi	GQ337385.1
72	Dolomedes schauinslandi	GQ337384.1
73	Dolomedes schauinslandi	GQ337383.1
74	Dolomedes horishanus	AB374064.1	INDOMALAYAN
75	Dolomedes horishanus	AB374063.1
76	Dolomedes horishanus	AB374062.1
77	Dolomedes indica sp. nov.	PQ553465
78	Dolomedes indica sp. nov.	PQ553467
79	Dolomedes indica sp. nov.	PQ553468
80	Dolomedes indica sp. nov.	PQ553466
81	Hygropoda higenaga	AB374066.1	OUTGROUP
82	Hygropoda higenaga	AB374065.1
